# Supplementary material
Source: Springer Nature journal article supplement (https://www.springermedizin.de/resource/supplementary/13256_2011_1847_MOESM1_ESM.pdf/9648614)

Serum calcium (mg/d)

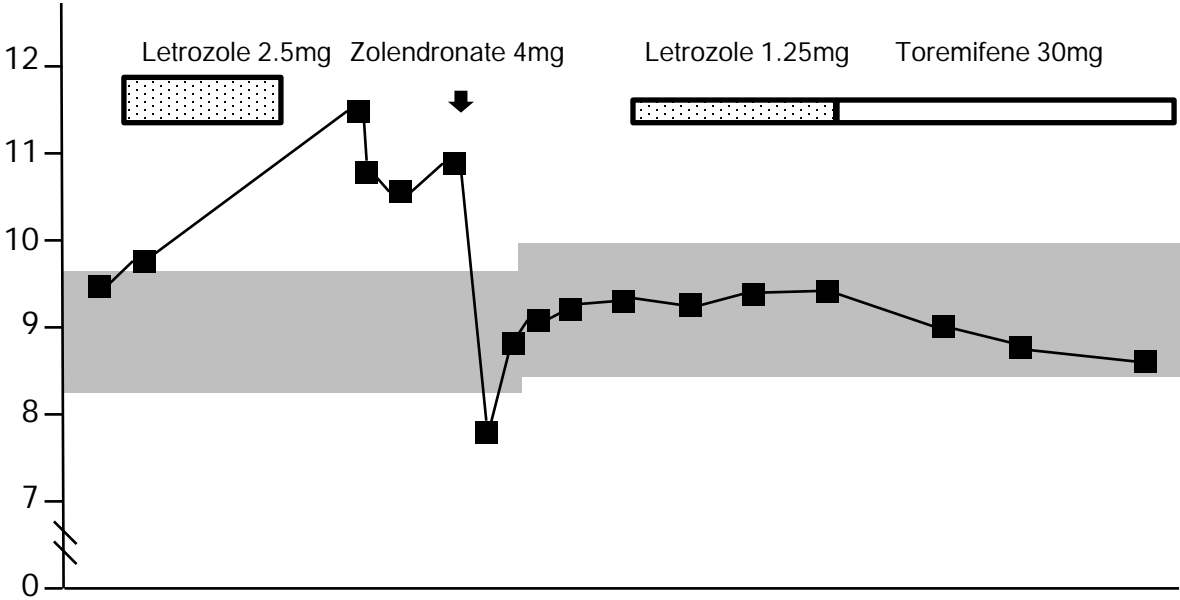

CEA (<5ng/ml) ○

CA15-3 (<23 U/ml) ●

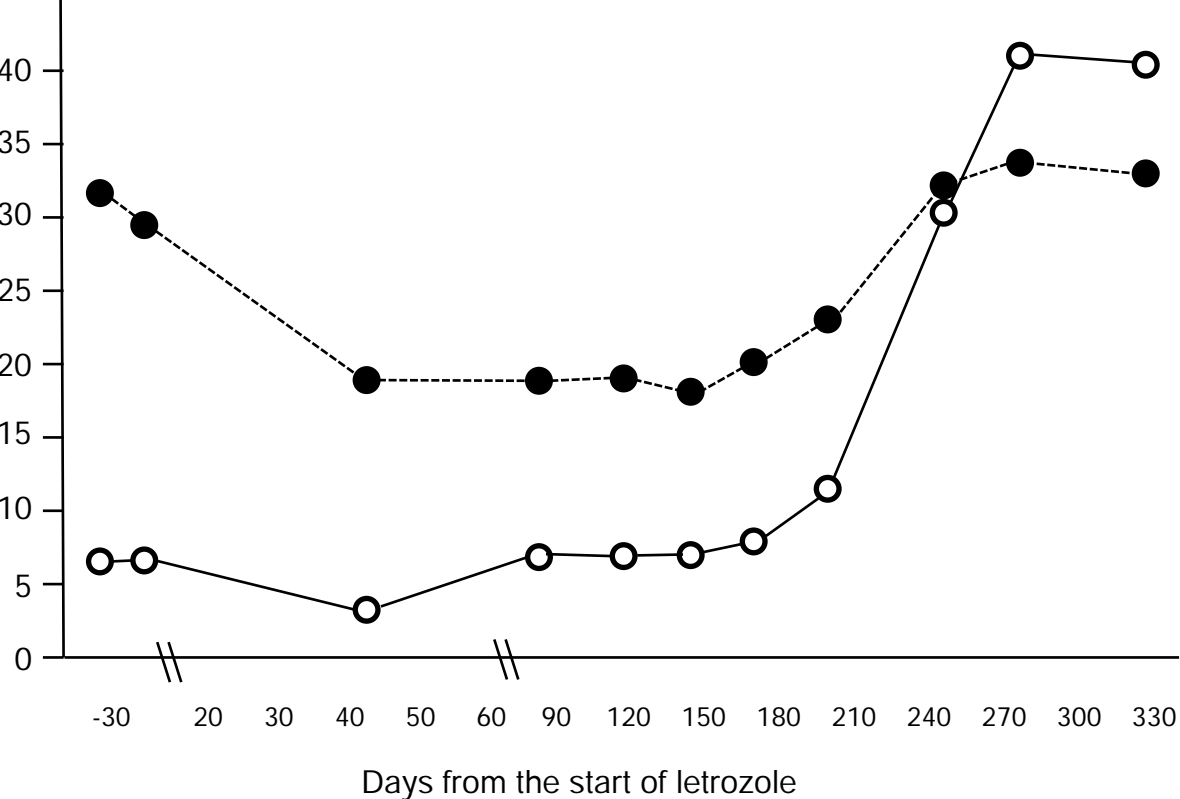

Supplement: MOESM1 [file 9648614]
